# Supplementary material for: Rieche formylation of carbon nanotubes – one-step and versatile functionalization route
Source: Royal Society of Chemistry journal article supplement (doi:10.1039/c7ra10525h), 2017-01-01
Supplement: c7ra10525h1.pdf [file c7ra10525h1.pdf]

Electronic Supplementary Information

for

***Rieche formylation of carbon nanotubes – one-step and versatile functionalization route***

by

Anna Kolanowska<sup>a</sup>, Anna Kuziel<sup>a</sup>, Yuliu Li<sup>a</sup>, Sebastian Jurczyk<sup>b</sup>, Sławomir Boncel<sup>a\*</sup>

*Silesian University of Technology, Department of Organic Chemistry, Bioorganic Chemistry and Biotechnology, Krzywoustego 4, 44-100 Gliwice, Poland.*

*Institute for Engineering of Polymer Materials and Dyes, Skłodowskiej-Curie 55, 87-100 Toruń, Poland*

\* corresponding author: tel.: +48 32 237 12 72, fax: +48 32 237 20 94, slawomir.boncel@polsl.pl (Sławomir Boncel).

***Synthesis of in-house MWCNTs***

In-house MWCNTs were synthesised via c-CVD at 760 °C with a feedstock continuously injected to a preheater at 250 °C. The main carbon source was toluene while catalyst precursor was FeCp<sub>2</sub> (5.5% wt.%). The carrier gas was Ar with the flow-rate of 1.8 L/min. The feedstock was dosed for 4 h at the rate 2.8 mL/h.

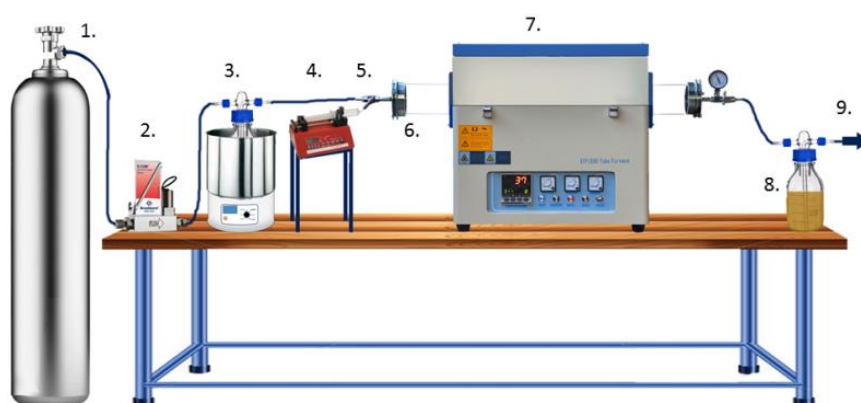

**Fig. S1.** Synthesis of in-house MWCNTs: 1) Ar cylinder, 2) flow-mass controller, 3) pre-heater, 4) syringe, 5) feedstock injection, 6) quartz tube, 7) furnace, 8) rinser, 9) exhausts to fume hood.
